# Supplementary material
Source: publisher figshare collection journal article supplement (https://acs.figshare.com/ndownloader/files/4393354)
Supplement: Supplementary file 1 [file 4393354]

# Supporting information

## Dynamic structural changes at $\text{LiMn}_2\text{O}_4$ /electrolyte interface during lithium battery reaction

*Masaaki Hirayama,<sup>a</sup> Hedekazu Ido,<sup>a</sup> KyungSu Kim,<sup>a</sup> Woosuk Cho,<sup>a</sup> Kazuhisa Tamura,<sup>b</sup> Jun'ichiro Mizuki,<sup>b</sup> and Ryoji Kanno<sup>a,\*</sup>*

<sup>a</sup> Department of Electronic Chemistry, Interdisciplinary Graduate School of Science and Engineering,  
Tokyo Institute of Technology, 4259 Nagatsuta, Midori-ku, Yokohama 226-8502, Japan

<sup>b</sup> Japan Atomic Energy Agency, Synchrotron Radiation Research Center,  
Kansai Research Establishment, 1-1-1 Kouto Sayo-cho Sayo-gun, Hyogo 679-5148, Japan

\*Email: kanno@echem.titech.ac.jp

Tel: +81-45-924-5401, Fax: +81-45-924-5409

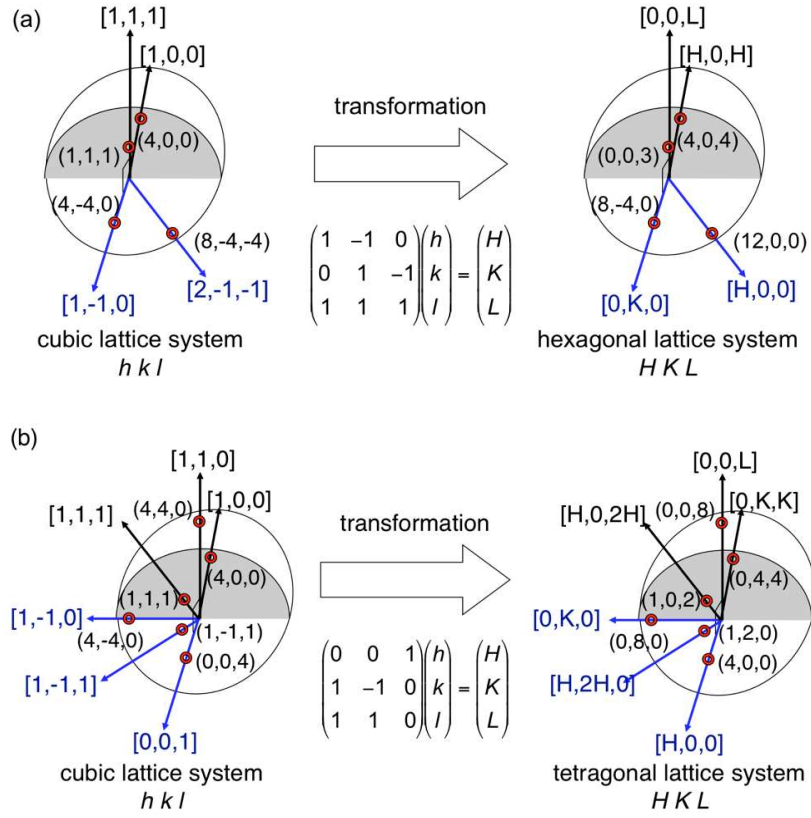

**Figure S1:** Reciprocal lattice space models of the transformation from the cubic system to the hexagonal lattice of (a) the  $\text{LiMn}_2\text{O}_4$  (111) film and (b) the tetragonal lattice of  $\text{LiMn}_2\text{O}_4$  (110) film.

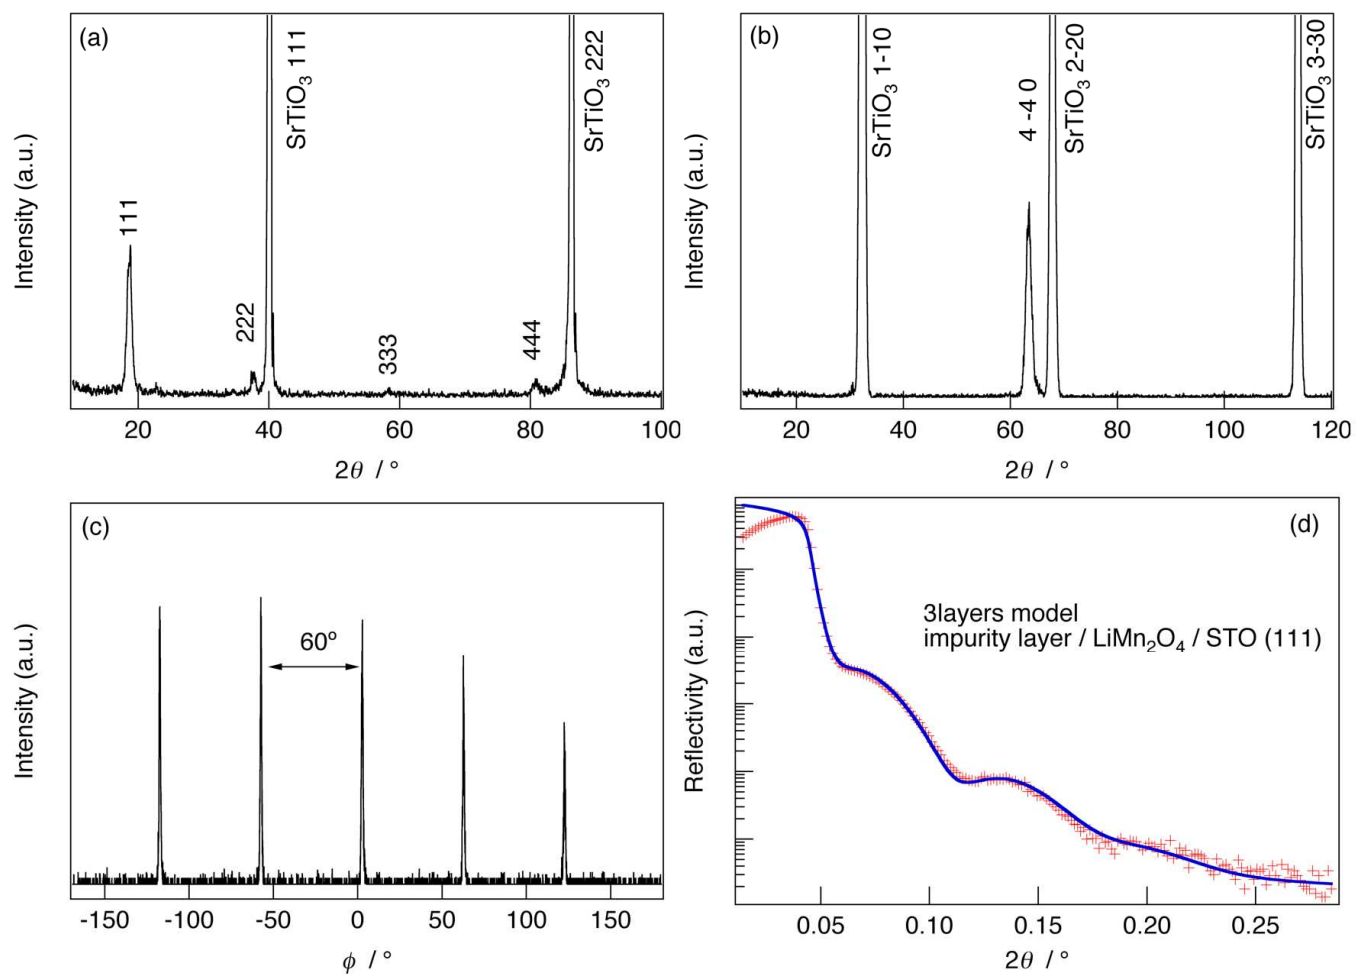

**Figure S2** (a–c) XRD patterns and (d) XRR and fitting curves of epitaxial  $\text{LiMn}_2\text{O}_4$  (111) thin film used for *in situ* XRD measurements.

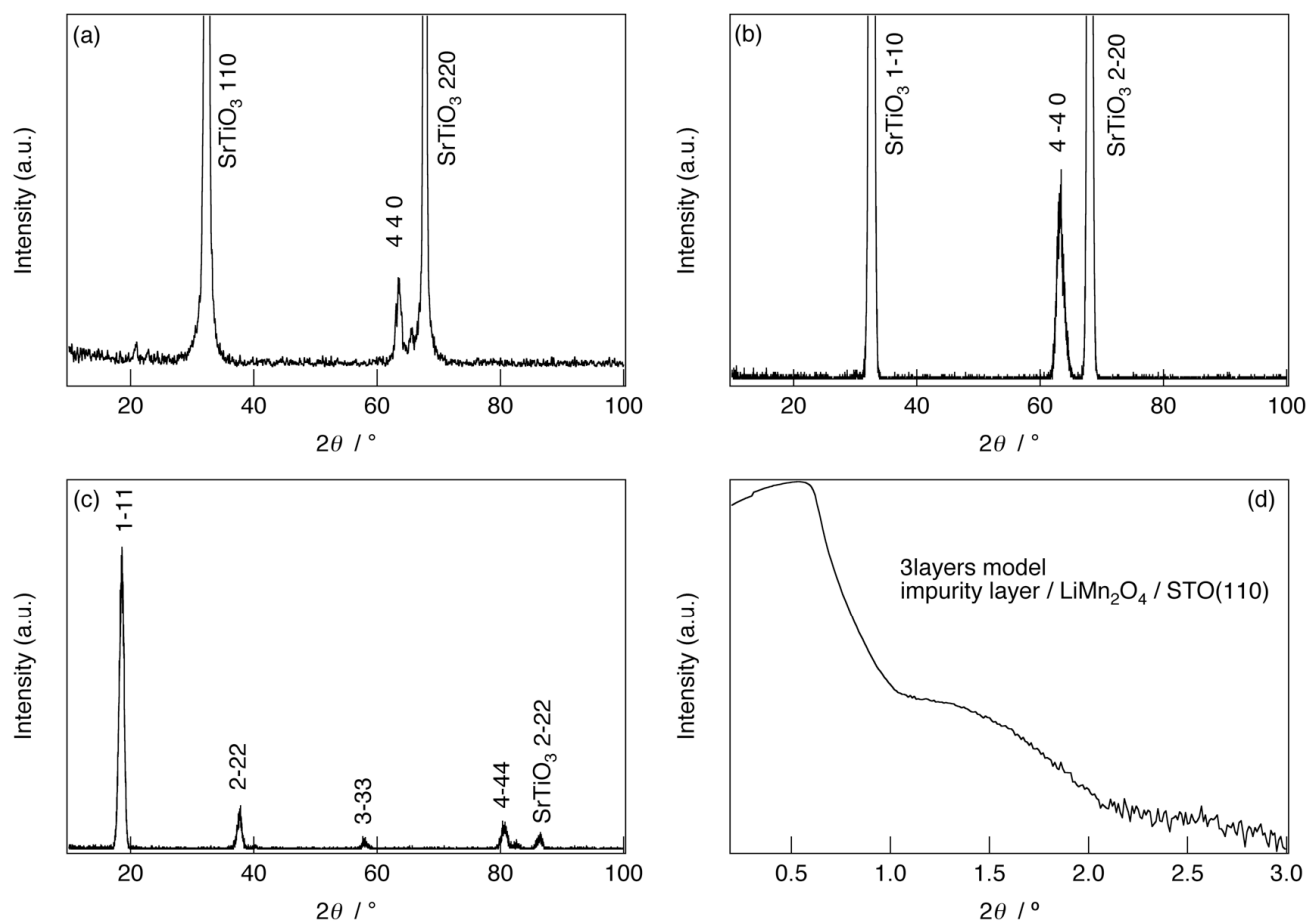

**Figure S3** (a–c) XRD patterns and (d) XRR curve of epitaxial  $\text{LiMn}_2\text{O}_4$  (110) thin film used for *in situ* XRD measurements.

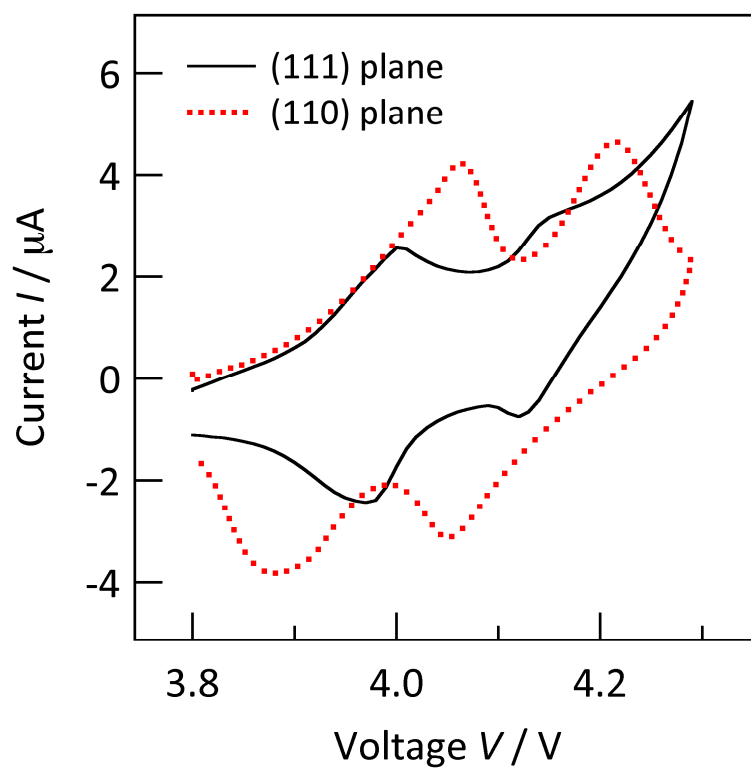

**Figure S4:** Cyclic voltamograms of epitaxial  $\text{LiMn}_2\text{O}_4$  thin films with (111) and (110) orientations on  $\text{SrTiO}_3\text{:Nb}$  substrates. Epitaxial  $\text{SrRuO}_3$  buffer layers were used to improve electric conduction between  $\text{LiMn}_2\text{O}_4$  and  $\text{SrTiO}_3\text{:Nb}$ .

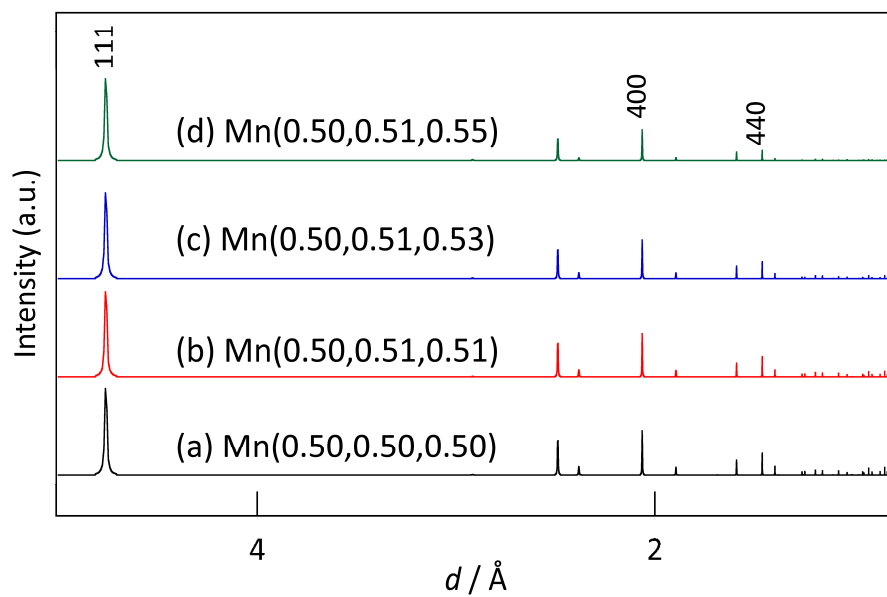

**Figure S5** Simulation of the XRD patterns of  $\text{LiMn}_2\text{O}_4$  with displaced Mn atoms.
